# Supplementary material
Source: Elsevier journal article supplement (https://www.sciencedirect.com/science/article/pii/S0300289623000030)
Supplement: mmc1 [file S0300289623000030:mmc1.docx]

**Supplementary Table 1.** Additional characteristics and risk of bias assessment of included observational studies on vaccine effectiveness of PCV13 and PPV23 in the same or similar populations.

| **Reference** | **Outcome measurements/case definitions** | **Assessment of PCV13 and PPV23 sequential vaccination** | **Period of follow up/time since vaccination** | **Vaccine effectiveness (VE) calculation** | **Results**  **VE % (95%CI)** | **Risk of bias assessment (ROBINS-I)** |
| --- | --- | --- | --- | --- | --- | --- |
| **Pneumococcal disease outcomes** | | | | | | |
| McLaughlin et al 2018[1] | PCV13-type CAP, defined as patients hospitalized for CAP in whom PCV13 serotypes were identified by any method, including from ssUAD or culture from blood, respiratory tract, or  pleural fluid | Not assessed; assessment of PCV13 VE adjusted for PPV23 receipt | PCV13 receipt within the previous 5 years | VE = (1- adjusted odds ratio) x 100% | VE against PCV13-type CAP:   - Unadjusted: 72.8 (12.8−91.5) - Adjusted: 71.2 (6.1−91.2)   VE against nonbacteremic PCV13-type CAP:   - Unadjusted: 70.1 (4.1−90.7) - Adjusted: 67.6 (–6.2 to 90.1) | Moderate |
| Chandler et al 2022[2] | PPV23-type CAP, defined as patients hospitalized for CAP in whom PPV23 serotypes were identified by ssUAD | Not assessed. People who had received PCV13 were excluded. | PPV23 receipt within the previous 5 years | VE = (1- adjusted odds ratio) x 100% | VE against PPV23-type CAP:   - Overall cohort (≥18y): 14 (-17–39) - ≥65y subgroup: 2 (-50–38) | Moderate |
| Heo et al 2021[3] | - Pneumococcal community acquired pneumonia (P-CAP), defined as pneumococcal infection identified by ≥1 diagnostic methods (sputum/blood culture, BinaxNOW, or ssUAD assay) - Vaccine-type community acquired pneumonia (VT-CAP), defined as PCV13- or PPV23-serotype pneumococcal infection identified by microbiological culture or ssUAD assay | Assessment of PCV13 VE adjusted for PPV23 receipt, and vice-versa.  For sequential PCV13/PPV23 VE, two analyses were conducted- one including single-dose pneumococcal vaccination recipients in the unvaccinated group (with adjustment), and the other excluding them from analysis. Results were similar. | Variable for PCV13 (not specified); PPV23 receipt within the previous 5 years | VE = (1-adjusted odds ratio) x 100% | VE against VT-CAP (≥65y):   - PCV13 alone (against PCV13 serotypes): 41.1 (-103.7–83.0) - PPV23 alone (against PPV23 serotypes): 6.3 (-73.8–49.5) - Sequential PCV13/PPV23 (against PCV13 and PPV23 serotypes): 44.6   (-84.0–83.3)  VE against VT-CAP (65–74y subgroup):   - PCV13 alone (against PCV13 serotypes): 58.1 (-245.5–94.9) - PPV23 alone (against PPV23 serotypes): 15.7 (-91.4–62.9) - Sequential PCV13/PPV23 (against PCV13 and PPV23 serotypes): 63.6   (-186.0–95.4)  VE against VT-CAP (≥75y subgroup):   - PCV13 alone (against PCV13 serotypes): 26.8 (-239.4–84.2) - PPV23 alone (against PPV23 serotypes): -2.0 (-161.7–60.2) - Sequential PCV13/PPV23 (against PCV13 and PPV23 serotypes): 24.8   (-233.1–83.0)  VE against P-CAP (≥65y):   - PCV13 alone: 40.0 (-10.8–67.5) - PPV23 alone: 11.0 (-26.4–37.3) - Sequential PCV13/PPV23: 38.5 (-21.0–68.7)   VE against P-CAP (65–74y subgroup):   - PCV13 alone: 66.4 (0.8–88.6) - PPV23 alone: 18.5 (-38.6–52.0) - Sequential PCV13/PPV23: 80.3 (15.9–95.4)   VE against P-CAP (≥75y subgroup):   - PCV13 alone: 14.0 (-83.2–59.6) - PPV23 alone: 6.4 (-49.9–41.6) - Sequential PCV13/PPV23: -14.8   (-152.9–47.9)  VE against nonbacteremic P-CAP (≥65y):   - PCV13 alone: 38.8 (-13.0–66.9) - PPV23 alone: -0.1 (-59.4–39.0) - Sequential PCV13/PPV23: 36.5 (-25.0–67.8)   VE against nonbacteremic P-CAP (65–74y subgroup):   - PCV13 alone: 66.5 (0.7–88.7) - PPV23 alone: 18.5 (-38.6–52.0) - Sequential PCV13/PPV23: 80.0 (14.4–95.3)   VE against nonbacteremic P-CAP (≥75y subgroup):   - PCV13 alone: 12.5 (-86.5–59.0) - PPV23 alone: 6.4 (-49.9–41.6) - Sequential PCV13/PPV23: -18.1   (-160.4–46.4) | Moderate |
| Love et al 2021[4] | Severe pneumococcal disease (pneumococcal meningitis, pneumococcal sepsis/bacteremia, pneumococcal pneumonia), determined by ICD-9/ICD-10 codes | Evaluated separately from PPV23 only and PCV13 only | Variable (not specified) | VE = (1-adjusted hazard ratio) x 100%, calculated from results | VE against severe pneumococcal disease:   - PCV13 alone: 79 (70–85) - PPV23 alone: -10 (-21–1) - ≥2 doses PPV23: 20 (5–33)   Sequential PCV13/PPV23: 83 (78–86) | Moderate |
| **Pneumonia or lower respiratory tract infection outcomes** | | | | | | |
| Kolditz et al 2018[5] | All-cause pneumonia, defined as main diagnosis of pneumonia or a main diagnosis of sepsis together  with a secondary diagnosis of pneumonia, determined by ICD-10 codes. Outpatient pneumonia cases were validated by ambulatory prescription of an antibiotic within 7 days of the diagnosis. | Not assessed. This study only evaluated PPV23; no study participants had received PCV13. | PPV23 receipt within the previous 5 years | VE= (1-risk ratio) x 100%, calculated from results | PPV23 VE against all-cause pneumonia:   - ≥60y: 3.2 (0.7–5.6) - 60–79y subgroup: -1.8 (-5.8–2.0) - ≥80y subgroup: 0.0 (-3.5–3.4) - Male subgroup ≥60y: 0.5 (-3.3–4.8) - Female subgroup ≥60y: 5.1 (1.7–8.4) | Moderate |
| Kolditz et al 2018[6] | All-cause pneumonia, defined as primary diagnosis of pneumonia or a main diagnosis of sepsis together with a secondary diagnosis of pneumonia, determined by ICD-10 codes. Outpatient pneumonia cases were validated by ambulatory prescription of an antibiotic within 7 days of the diagnosis. | Not assessed. People who had received PPV23 after January 2012 were excluded. | PCV13 receipt within the previous 5 years | VE= (1-risk ratio) x 100%, calculated from results | PCV13 VE against all-cause pneumonia:   - ≥60y: 11.9 (3.2–19.9) - 60–79y subgroup: 7.8 (-5.2–19.2) - ≥80y subgroup: 11.0 (-1.9–22.3) - Male subgroup ≥60y: 3.7 (-9.1–14.9) - Female subgroup ≥60y: 19.0 (6.4–29.8) | Moderate |
| Lewnard et al 2021[7] | - All-cause, medically-attended (inpatient or outpatient, including emergency department) pneumonia, determined by ICD-10 codes - All-cause, medically-attended (inpatient or outpatient, including emergency department) lower respiratory tract infection (LTRI), determined by ICD-10 codes   For both pneumonia and LRTI, outcomes were the first diagnosed episode during each year of follow-up. | Not assessed. Analysis of PCV13 adjusted for receipt of PPV23, and vice-versa. | Variable (not specified) | VE = (1-adjusted hazard ratio) x 100% | VE against all-cause pneumonia:   - PCV13 VE 8.8 (-0.2–17.0) - PPV23 VE 1.0 (-18.0–17.0)   VE against all-cause LRTI:   - PCV13 VE 9.9 (1.1–17.9) - PPV23 VE 3.9 (-9.4–15.6) | Moderate |
| Hsaio et al 2022[8] | - All-cause, hosptialized pneumonia, determined by ICD-9/ICD-10 codes (first event) - All-cause, hospitalized LRTI, determined by ICD-9/ICD-10 codes (first event) |  | Variable for PCV13 (not specified); PPV23 receipt within the previous 5 years | VE = (1-adjusted relative risk) x 100% | VE against all-cause, hospitalized pneumonia:   - PCV13 VE 10.0 (2.4–17.0) - PPV23 VE -8.0 (-20–3)   VE against all-cause, hospitalized LRTI:   - PCV13 VE 9.4 (2.1–16.1) - PPV23 VE -8.0 (-20–3) | Moderate |
| **COVID-19** | | | | | | |
| Lewnard et al. 2021(30) | - COVID-19 diagnosis, defined as a positive result of a molecular test for SARS-CoV-2 infection or a clinically confirmed COVID-19 diagnosis - COVID-19 hospitalization, defined as a new inpatient admission between 7 days before and 28 days after a COVID-19 diagnosis | Evaluated separately from PPV23 only and PCV13 only; compared with no pneumococcal vaccination | Variable (not specified) | VE = (1-negative control corrected adjusted hazard ratio) x 100%, calculated from results | VE against COVID-19 diagnosis:   - PCV13: 35 (28–41) - PPV23: -19 (-36–-5) - Sequential PCV13/PPV23: 34 (24–44)   VE against COVID-19 hospitalization:   - PCV13: 32 (17–43) - PPV23: -2 (-29–22) - Sequential PCV13/PPV23: 46 (27–59) | Moderate |

**Supplementary Table 2**. Characteristics of excluded observational studies on vaccine effectiveness of PCV13 and PPV23 in the same or similar populations.

| **Reference** | **Design** | **Study population or analytic cohort** | **Study period** | **Pneumococcal vaccination history of participants** | **Outcomes** | **Results**  **VE % (95%CI)** | **Reason for exclusion** |
| --- | --- | --- | --- | --- | --- | --- | --- |
| **Pneumococcal disease and pneumonia outcomes** | | | | | | | |
| Perniciaro et al 2021[9] | Prospective, indirect cohort study investigating vaccine status of IPD1 cases | 928 German adults ≥60y with IPD | 2018–2019 | - 21.4% PPV23 only - 3.6% PCV13 only - Patients who received both PCV13 and PPV23 excluded | VT-IPD1 | - PPV23 VE against VT-IPD: 37 (12–55) - PCV13 VE against VT-IPD: 21 (-68–66) | Low PCV13 vaccination among study population |
| Prato et al 2018[10] | Prospective cohort; test-negative design for hospitalized patients, case-control for outpatients | 186 Italian adults aged ≥65y with CAP | 2013–2015 | - 32% PPV23 - 11% PCV13 | Pneumococcal CAP (pCAP); VT-CAP | - PPV23 VE against pCAP: -4 (-115.4–50.4) - PCV13 VE against pCAP 33.2 (-106.6–82) - PCV13 VE against VT-CAP 38.1 (-131.9–89) | PPV23 results only provided for a subset of analyses; serious risk of bias according to ROBINS-I |
| Ignatova et al 2021[11] | Prospective cohort with 5 year follow-up post vaccination | 302 Russian men aged ≥45y with chronic obstructive pulmonary disease | 2012–2017 | - 41% PCV13 - 11% PPV23 | Pneumonia episodes per year | VE = (1 - rate ratio) x 100%, calculated from results; 95%CIs could not be calculated.  1 year post vaccination:  PCV13 VE = 67%  PPV23 VE = 58%  5 years post vaccination:  PCV13 VE = 86%  PPV23 VE = -104% | Most results were presented as figures without numerical data; Insufficient methods information to complete ROBINS-I risk of bias assessment |
| Vila-Corcoles et al 2020[12] | Cohort study using hospital database | 2,025,730 Spanish adults >50y | 2015–2016 | - 39% PPV23 - 0.2% PCV13 | Hospitalized pneumococcal pneumonia; hospitalized all-cause pneumonia | VE = (1 - adjusted hazard ratio) x 100%, calculated form results.   - PPV23 VE against pneumococcal pneumonia: -8 (-19–2) - PCV13 VE against pneumococcal pneumonia: -52 (-97–-17) - PPV23 VE against all-cause pneumonia: -17 ( -21–-13) - PCV13 VE against all-cause pneumonia: -76 ( -95– -61) | Low PCV13 vaccination among study population |
| **COVID-19 outcomes** | | | | | | | |
| Satue-Gracia et al 2021[13] | Population-based cohort study | 79,083 Spanish adults >50y | March–June 2020 | - 33.1% PPV23 - 1.4% PCV13 | Laboratory confirmed COVID-19 (n=536) | - PPV23 VE against COVID-19: -5 (-35–18) - PCV13 VE against COVID-19: -74 (-185–6) | Low PCV13 vaccination among study population |
| Fernandez-Prada et al 2021[14] | Case-control study, test-negative design | 188 Spanish patients tested for COVID-19 | Feb–May 2020 | - 19.1% PCV13 - 10.6% PPSV23 - 8.5% PCV13 and PPV23 | PCR+ for COVID-19 (n=63) | VE = (1 - odds ratio) x 100%, calculated from results.   - PCV13 VE against COVID-19: 60 (-0.6–83) - PPV23 VE against COVID-19: 30 (-110–72) - Sequential PCV13/PPV23 VE against COVID-19: 80 ( -18.2–94) | No adjustment for underlying conditions (serious risk of bias) |

1IPD = invasive pneumococcal disease; VT-IPD = vaccine-type IPD

2CAP= community-acquired pneumonia; VT-CAP = vaccine-type CAP

3UAD = serotype-specific urinary antigen detection assay

**References**

1. McLaughlin JM, Jiang Q, Isturiz RE, et al. Effectiveness of 13-Valent Pneumococcal Conjugate Vaccine Against Hospitalization for Community-Acquired Pneumonia in Older US Adults: A Test-Negative Design. Clin Infect Dis **2018**; 67(10): 1498-506.

2. Chandler T, Furmanek S, Carrico R, Balcom D, Arnold F, Ramirez J. 23-Valent Pneumococcal Polysaccharide Vaccination does not prevent community-acquired pneumonia hospitalizations due to vaccine-type *Streptococcus pneumoniae*. Microorganisms **2022**; 10(3): 560.

3. Heo JY, Seo YB, Choi WS, et al. Effectiveness of pneumococcal vaccination against pneumococcal pneumonia hospitalization in older adults: a prospective, test-negative study. J Infect Dis **2022**; 225(5): 836-45.

4. Love BL, Finney CJ, Gaidos JKJ. Effectiveness of conjugate and polysaccharide pneumococcal vaccines for prevention of severe pneumococcal disease among inflammatory bowel disease patients. J Crohns Colitis **2021**; 15(8): 1279-83.

5. Kolditz M, Schmitt J, Pletz MW, Tesch F. Impact of pneumococcal polysaccharide vaccine on incidence and mortality after pneumonia in adults aged ≥60 years-a population-based retrospective cohort study. Clin Microbiol Infect **2018**; 24(5): 500-4.

6. Kolditz M, Schmitt J, Pletz MW, Tesch F. Impact of the 13-valent pneumococcal conjugate vaccine on the incidence of all-cause pneumonia in adults aged ≥60 years: a population-based, retrospective cohort Study. Clin Infect Dis **2019**; 68(12): 2117-9.

7. Lewnard JA, Bruxvoort KJ, Fischer H, et al. Effectiveness of 13-valent pneumococcal conjugate vaccine against medically-attended lower respiratory tract infection and pneumonia among older adults. Clin Infect Dis **2021**; ciab1051.

8. Hsiao A, Hansen J, Timbol J, et al. Effectiveness of 13-Valent Pneumococcal Conjugate Vaccine Against Hospitalized All-Cause Pneumonia in Older US Adults. JAMA Netw Open **2022;** 5(3):e221111.

9. Perniciaro S, van der Linden M. Pneumococcal vaccine uptake and vaccine effectiveness in older adults with invasive pneumococcal disease in Germany: A retrospective cohort study. Lancet Reg Health Eur **2021**; 7:100126.

10. Prato R, Fortunato F, Cappelli MG, Chironna M, Martinelli D. Effectiveness of the 13-valent pneumococcal conjugate vaccine against adult pneumonia in Italy: a case-control study in a 2-year prospective cohort. BMJ Open **2018**; 8(3): e019034.

11. Ignatova GL, Avdeev SN, Antonov VN. Comparative effectiveness of pneumococcal vaccination with PPV23 and PCV13 in COPD patients over a 5-year follow-up cohort study. Sci Reports **2021**; 11(1): 15948.

12. Vila-Corcoles A, Hospital I, Ochoa-Gondar O, et al. Clinical effectiveness of 13-valent and 23-valent pneumococcal vaccination in middle-aged and older adults: The EPIVAC cohort study, 2015-2016. Vaccine **2020**; 38(5): 1170-80.

13. Satué-Gracia E, Vila-Córcoles A, de Diego-Cabanes C, et al. Susceptibility and risk of SARS-COV-2 infection among middle-aged and older adults in Tarragona area, Spain. Med Clin (Barc) **2022**; 158(6):251-259.

14. Fernández-Prada M, García-González P, García-Morán A, Ruiz-Álvarez I, Ramas-Diez C, Calvo-Rodríguez C. Personal and vaccination history as factors associated with SARS-CoV-2 infection. Med Clin (Barc) **2021**; 157(5):226-233.
